# Supplementary material for: Wake slow waves in focal human epilepsy impact network activity and cognition
Source: Research Square preprint supplement (doi:10.21203/rs.3.rs-2693418/v1), 2023-03-15
Supplement: Supplementary file 1 [file a839840137356a6e98e91f98.docx]

**Supplementary Information**

**Wake slow waves in focal human epilepsy impact network activity and cognition**

Laurent Sheybani, Umesh Vivekananda, Roman Rodionov, Beate Diehl, Fahmida Chowdhury, Andrew W McEvoy, Anna Miserocchi, James Bisby, Daniel Bush, Neil Burgess, Matthew C Walker

**LoWS rate is anticorrelated with IEDs rate**

We observed a negative correlation between LoWS rate and IEDs rate (Fig. 3e). Since the number of IEDs per recording is finite and LoWS identification is automatic (except for the visual removal of artefacts and post-IED waves, see Online Methods), the proportion of IEDs mislabelled as LoWS (if any) should be constant across patients and the correlation should thus be positive. We confirmed this by constructing 20 time-series made of 10’000 to 30’000 datapoints each (the duration was selected randomly using *datasample.m*). We then randomly defined a number of “original markers” (markers A) between 1 and a number equal to the duration of the time-series. Within these original markers, we randomly selected a number of mislabelled events (markers A’), from 1 to a number equal to the total number of original markers. We then calculated, across the 20 datasets, the Pearson correlation between the mislabelled events (A’) rate and the remaining events (A minus A’) rate. To calculate the mislabelled events rate, the number of remaining events was subtracted to the total duration of the time-series, since mislabelled and remaining events cannot occur simultaneously (as LoWS and IEDs). We repeated the operation 10’000 times to obtain a distribution of the *r*-values. *R*-values extended from 0.55 to 0.75 (25-75th percentile), with a median of 0.66, which was significantly different from 0 (one sample Wilcoxon text, *p*<0.0001, Extended Data Fig. 9). This confirms that the correlation between two events, which together constitute a population of one single event, is positive.
